# Supplementary material
Source: Springer Nature journal article supplement (https://www.springermedizin.de/resource/supplementary/12885_2011_3119_MOESM3_ESM.pdf/9462674)

**A**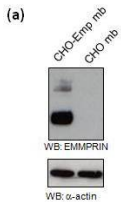**(b)**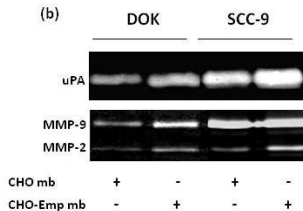**(c)**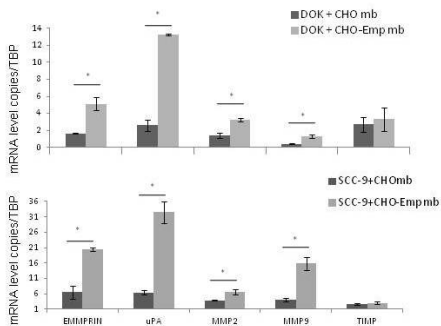**(d)**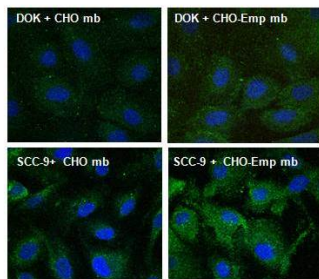**B**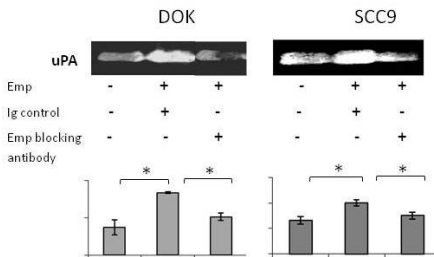**C**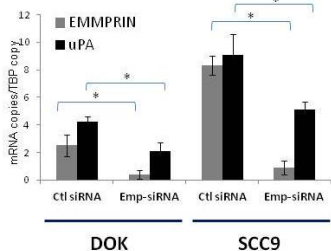

Supplement: MOESM3 [file 9462674]
